# Supplementary material
Source: publisher figshare collection journal article supplement (https://future-science-group.figshare.com/ndownloader/files/26376907)
Supplement: Supplementary file 1 [file 26376907]

## Sheet: SupplementaryTable1
Antibodies validated for routinely processed tissue seldom apply to frozen tissue sections
Species	Ab	clone	Source	FFPE	Dilution	RRID	Ac	FA	FA> AR	Classification	validation	Source	Reference
Rat	AID	MAID-2	Thermo	yes	1 µg/ml	10669583	neg	neg	neg	neg	genetic, independent Ab	our Lab	10.1182/blood-2005-10-4170
RbMab	AXL	C89E7	CST	yes	1:200	11217435	+++	+	+/-	misc
g1	bcl-2	Bcl-2-100	Merck	yes	1 µg/ml	258541	+++	+++	+++	conserved	genetic
g3	BCL6	D-8	SCBT	yes	1 µg/ml	2063455	+++	+++	++	conserved	independent Ab	our Lab	PMID: 7795255
Rat	Blimp1/PRDM1	6D3	SCBT	yes	1:5000	628168	note	+/-	+++	FA blocked	independent Ab, historic	our Lab	10.4049/jimmunol.165.10.5462
g1	BMI1	F6	Millipore	yes	1:1000	309865	neg	neg	neg	neg
g1	CD10	NCL-CD10-L-270	Leica-Microystem	yes	1 µg/ml	442048	++	++	++	conserved	cross-species	our Lab	10.1369/0022155415597738
RbMab	CD103	EP206	Bio SB	yes	1:200		+++	neg	+++	FA blocked
g1	CD11c	B-6	SCBT	yes	1 µg/ml	626859	neg	neg	neg	neg
g2A	CD123	7G3	BD Pharmingen	no	1 µg/ml	395454	+++	+++	+++	conserved	orthogonal	our Lab	https://doi.org/10.1101/369983
g2B	CD123	NCL-L-CD123	Leica-Microystem	yes	1:100	10555271	neg	neg	+++	conformational	orthogonal, historic	our Lab	https://doi.org/10.1101/369983
g1	CD133	AC133	Milteny	yes	1 µg/ml	244341	+++	++	+	conserved	orthogonal	our Lab
Ig	CD14	5A3B11B5	SCBT	yes	1 µg/ml	781932	+/-	bckgnd	+++	conformational	independent Ab	this paper
Rb	CD14	poly	Merck	yes	1 µg/ml	1078467	neg	neg	neg	neg	independent Ab	this paper
RbMab	CD141	EPR4051	Abcam/Epitomics	yes	1 µg/ml	2201805	+++	neg	++	FA blocked	independent Ab	this paper
g2A	CD141	D-3	SCBT	yes	1 µg/ml	2201940	neg	neg	+++	conformational	independent Ab	this paper
g2A	CD16	2H7	Leica-Microystem	yes	1:100	563508	neg	neg	neg	neg	independent Ab	our Lab
g1	CD163	GHI/61	SCBT	no	1 µg/ml	626933	+++	+++	neg	conformational	independent Ab	this paper
g1	CD163	RM3/1	SCBT	no	1 µg/ml	626932	+++	neg	neg	FA blocked	independent Ab	this paper
g1	CD163	10D6	Thermo	yes	1:100	10982556	neg	neg	+	conformational	independent Ab	this paper
g1	CD1A	O10	SCBT	yes	1 µg/ml	626957	+++	+++	neg	conformational	historic
g1	CD1c	2F4	Origene	yes	1:500	2623067	neg	neg	neg	neg	orthogonal		https://doi.org/10.1101/369983
g1	CD1c	2D4	Origene	yes	1:500	2623049	neg	neg	neg	neg	orthogonal		https://doi.org/10.1101/369983
g1	CD1c	UMAB46	Origene	yes	1 µg/ml	2629056	neg	neg	neg	neg	peptide microarray, orthogonal		https://doi.org/10.1101/369984
g2A	CD2	B-8	SCBT	yes	1 µg/ml	2073673	neg	neg	neg	neg
g2A	CD20	L26	Dako	yes	1 µg/ml	2282030	+++	+++	+++	conserved	historic
g2B	CD206	# 685645	R&D	yes	1 µg/ml		note	+++	+++	FA dependent
Rb	CD207 langerin	poly	Merck	yes	1 µg/ml	1078467	neg	neg	neg	neg	historic
g2A+2B	CD21	2G9 + A3	Thermo + SCBT	yes	1 µg/ml		+/-	neg	+++	FA blocked	historic
RbMab	CD22	SP104	Merck	yes	1 µg/ml		+++	+++	+++	conserved
g2A	CD23	UMAB101	Origene	yes	1 µg/ml	2629143	neg	neg	++	conformational
g1	CD248	B1/35	BD Pharmingen	yes	1 µg/ml	11212259	+++	neg	++	FA blocked
RbMab	CD27	EPR8569	Abcam/Epitomics	yes	1 µg/ml	11155136	+	+++	+++	conserved
g1	CD271	NGFR 5	Neomarkers	yes	1 µg/ml	61258	+++	+	++	conserved	historic
Rb	CD3	poly	Merck	yes	1 µg/ml	259074	+	neg	neg	FA blocked	independent Ab, cross-species	this paper	10.1369/0022155415597738
Rat	CD3	CD3-12	SCBT	yes	1 µg/ml	1120361	+++	+/-	++	FA blocked	independent Ab	this paper
RbMab	CD3	SP7	Thermo	yes	1:200	149922	+++	note	+++	FA blocked	independent Ab, historic	this paper
g1	CD30	BerH2	SCBT	yes	1 µg/ml	2335683	+++	+	+	conserved	independent Ab, historic	this paper
g2A	CD30	CON6D/ C2	Thermo	yes	1 µg/ml	10988551	+++	+/-	+++	FA blocked	independent Ab	this paper
g1	CD303	AC144	Milteny	no	1 µg/ml	244165	+++	neg	neg	misc	independent Ab	this paper
Rb	CD303	poly	Merck	yes	1 µg/ml	1078467	neg	neg	neg	neg	independent Ab	this paper
g1	CD303	124b3.13	Dendritics	yes	1 µg/ml		note	note	neg	neg	independent Ab	this paper
RbMab	CD30v	E4L4I	CST	yes	1:200	2799462	neg	neg	neg	neg	independent Ab	our Lab
g1	CD31	JC70	SCBT	yes	1 µg/ml	629040	+	++	+++	conserved	historic
g2B	CD32abc	B-4	SCBT	yes	1 µg/ml	2103735	neg	note	note	neg
g3	CD34	43A1	SCBT	yes	1 µg/ml	631133	+++	+++	+/-	conformational	independent Ab	our Lab
g2B	CD39	IMG17B5F11	Abcam/Epitomics	yes	1 µg/ml		neg	neg	neg	neg
RbMab	CD4	EPR6855	Abcam/Epitomics	yes	1:200		+	+/-	+++	conformational	independent Ab	this paper
g1	CD4	MT310	SCBT	no	1 µg/ml	627055	+++	neg	neg	FA blocked	independent Ab	this paper
g1	CD45	Hle-1 2D1	BD Pharmingen	no	1 µg/ml	400154	+++	+++	neg	conformational	independent Ab, historic	this paper
g1	CD45+43	PD7/26 + 35-Z6`	BioLegend	yes	1 µg/ml		+++	+++	+++	conserved	independent Ab, historic	this paper
g2A	CD45R0	UCHL-1	SCBT	yes	1 µg/ml	627083	+++	++	+++	conserved	independent Ab, historic	our Lab
g1	CD5	CD5/54/F6	SCBT	yes	1:200	2075324	+/-	neg	+++	FA blocked	cross-species, historic	our Lab	10.1369/0022155415597738
g1	CD56	123C3.D5	SCBT	yes	1 µg/ml	627127	note	note	note	neg	historic
g1	CD64	OTI3D3	Origene	yes	1 µg/ml	2623718	neg	note	+++	conformational	independent Ab, historic	our Lab	10.1038/s41598-020-57627-1
g1	CD68	KP1	SCBT	yes	1 µg/ml	627158	+++	++	+++	conserved	independent Ab, historic	this paper	10.1038/s41598-020-57627-1
g3	CD68	PGM1	Thermo	yes	1:200	10979558	neg	+/-	+	FA dependent	independent Ab	this paper	10.1038/s41598-020-57627-1
Rb	CD69	poly	Merck	yes	1:100	1078467	neg	neg	neg	neg	orthogonal	our Lab	10.1038/s41598-020-57627-1
Rb	CD7	poly	Merck	yes	1 µg/ml	1078467	+	neg	neg	misc
g1	CD74	UMAB231	Origene	yes	1 µg/ml		+/-	neg	+/-	FA blocked	orthogonal	our Lab	https://doi.org/10.1101/369983
g1	CD79a	JCB117	SCBT	yes	1 µg/ml	1120686	++	+	+++	conserved	independent Ab, cross-species	this paper
g1	CD79a	HM47/A9	Merck	yes	1 µg/ml	10897816	+++	+++	+++	conserved	independent Ab	this paper
g1	CD8	C8/144B	SCBT	yes	1 µg/ml	1120718	+++	note	+++	conserved	independent Ab, historic	this paper
g2B	CD83	F-5	SCBT	yes	1 µg/ml	831132	neg	neg	++	conformational	independent Ab	our Lab
Gt	CD86	poly	Merck	yes	1 µg/ml	1078467	neg	neg	neg	neg
g1	CD8beta	F5	SCBT	yes	1 µg/ml	627211	+/-	neg	++	FA blocked	independent Ab	this paper
g1	CDKN1B p27	DCS-72.F6	Neomarkers	yes	1 µg/ml	61869	+++	+	++	conserved	orthogonal	our Lab
Rb	CLEC10A	poly	Merck	yes	1 µg/ml	1078467	+/-	neg	neg	neg	orthogonal	our Lab	https://doi.org/10.1101/369983
Gt	CLEC9A	poly	Merck	yes	1 µg/ml	1078467	neg	neg	+	conformational	orthogonal	our Lab	https://doi.org/10.1101/369983
g1	CLEC9A	14N8D7	Thermo	no	1 µg/ml	2537779	neg	neg	neg	neg	orthogonal	our Lab	https://doi.org/10.1101/369983
Rb	cMAF	poly	Merck	yes	1 µg/ml	1078467	neg	+/-	+/-	FA dependent
Rb	cREL	poly	Merck	yes	1 µg/ml	1078467	+/-	neg	+	FA blocked	orthogonal	our Lab	10.1182/blood-2003-04-1359
Gt	CXCL13	poly	Merck	yes	1 µg/ml	1078467	+++	+	++	conserved	independent Ab	our Lab
g2B	CXCR5	#51505	R&D	yes	1 µg/ml	2292654	+++	note	+++	FA blocked
Rb	EOMES	poly	Merck	yes	1 µg/ml	1078467	neg	neg	neg	neg
g1	FoxP3	236A/E7	Abcam/Epitomics	yes	1 µg/ml	445284	++	neg	+++	FA blocked	independent Ab	our Lab
Gt	GATA3	poly	Merck	yes	1 µg/ml	1078467	neg	neg	neg	neg
g2A	GZMB	GRB7	BioLegend	yes	1 µg/ml		neg	+++	neg	misc	historic
g2B	GZMK	GM6C3	SCBT	no	1 µg/ml		+++	++	+++	conserved
g3	Histone H3	1D8	Merck	yes	1 µg/ml	1841955	+/-	neg	+++	conformational
g1	HLA-DR	L243	BD Pharmingen	no	1 µg/ml	400289	+++	+++	neg	conformational	orthogonal, historic	this paper	https://doi.org/10.1101/369983
g2B	HLA-DR	SPM288	SCBT	yes	1 µg/ml	1125217	+++	+++	+++	conserved	orthogonal	this paper	https://doi.org/10.1101/369983
RbMab	ID1	BCH-1/195-14	Biocheck	yes	1 µg/ml		neg	neg	neg	neg	genetic	Company
RbMab	ID2	BCH-3/9-2-8	Biocheck	yes	1 µg/ml		note	+++	++	FA dependent	genetic	Company
RbMab	IDO	D5J4E	CST	yes	1:200	2626818	neg	neg	neg	neg
Gt	IgD	poly	Merck	yes	1 µg/ml	1078467	+++	++	+++	conserved	independent Ab	our Lab
Rat	IRF4	3E4	SCBT	yes	1 µg/ml	2127138	+/-	+	+/-	conserved	independent Ab	our Lab	10.4049/jimmunol.177.10.6930
Gt	IRF4	poly	Merck	yes	1 µg/ml	1078467	+/-	+++	+++	FA dependent	independent Ab, cross-species	our Lab	10.4049/jimmunol.177.10.6930
g2B	IRF8	E-9	SCBT	yes	1 µg/ml	10850401	+/-	+++	+++	FA dependent	independent Ab	this paper
Rb	IRF8	poly	Merck	yes	1 µg/ml	1078467	neg	+/-	+/-	FA dependent	independent Ab, cross-species	this paper
Gt	kappa	poly	Merck	yes	1 µg/ml	1078467	+/-	+++	+/-	conserved	independent Ab, orthogonal	our Lab
RbMab	Ki-67	SP6	Thermo	yes	1:100	2335745	++	+++	+++	conserved	independent Ab, historic	this paper
g2A	Ki-67	UMAB107	OriGene	yes	2 µg/ml	2629145	+++	+++	+++	conserved	independent Ab	this paper
g1	Ki-67	MIB3	J.Gerdes	yes	1:100		+++	+++	+++	conserved	independent Ab, historic	this paper	10.1002/path.1711680404
g1	LAG3	11E3	Abcam/Epitomics	yes	1:500	776102	++	neg	neg	misc	independent Ab	our Lab
Rb	lambda	poly	Merck	yes	1 µg/ml	1078467	+/-	++	+++	conserved	independent Ab, orthogonal	our Lab
g2A	LEF1	B-10	SCBT	yes	1 µg/ml	10991107	+++	neg	++	FA blocked
Gt	LYVE1	poly	Merck	yes	1 µg/ml	1078467	+++	+++	+++	conserved
Rb	LYZ	poly	Merck	yes	1 µg/ml	1078467	+/-	+++	+++	FA dependent	historic
Rb	MX-1	poly	Merck	yes	1 µg/ml	1078467	neg	neg	neg	neg	orthogonal
RbMab	MYC	EP121	Merck	yes	1 µg/ml		+++	neg	++	FA blocked	independent Ab	our Lab	10.1002/path.4141
g1	NFkB1 p50	E-10	CST	yes	1 µg/ml		neg	neg	neg	neg	orthogonal	our Lab	10.1182/blood-2004-12-4901
g2A	NFkB2 p52	C-5	SCBT	yes	1 µg/ml		+/-	note	+	FA blocked	orthogonal	our Lab	10.1182/blood-2004-12-4901
g1	OX40	Ber-ACT35	SCBT	yes	1 µg/ml	626897	+++	neg	++	FA blocked	genetic, independent Ab
Rat	Pax5	1H9	Merck	yes	1 µg/ml	2236668	+++	+/-	+++	conserved	independent Ab	our Lab
Rb	PD-L1	pool	BioLegend	yes	1 µg/ml		+++	note	++	conserved	peptide microarray, historic
g2A	PD1 pool	UMAB197 + UMAB199	BioLegend	yes	1 µg/ml		+++	neg	++	FA blocked	peptide microarray, independent Ab
Rat	PNAd	MECA-79	SCBT	yes	1 µg/ml	627143	neg	++	++	FA dependent	orthogonal
Rat	Podoplanin	NZ-1.2	LsBio	yes	1:100	10920577	note	note	note	conserved	orthogonal
g2A	PU1	G148-74	BD Pharmingen	yes	1 µg/ml	395335	neg	neg	neg	neg	independent Ab, historic	this paper
g1	PU1pool	B-9 + C-3	BioLegend	yes	1 µg/ml		+/-	neg	+++	FA blocked	independent Ab	this paper
Rat	RBPJ	3E2	E. Klemmer	yes	1:100		neg	+	+++	FA dependent
g2A	RORC	6F3.1	Abcam/Epitomics	yes	1 µg/ml		neg	neg	neg	neg
Rb	S100AB	poly	Dako	yes	1 µg/ml		neg	+/-	+	FA dependent	independent Ab, historic	our Lab
g2A	SOX9	CL0639	Merck	yes	1 µg/ml	2665670	neg	neg	+++	conformational
g1	TBET	O4-46	BD Pharmingen	yes	1 µg/ml		+/-	+++	+++	FA dependent
RbMab	TCF4	NCI-R159-6	Abcam/Epitomics	yes	1 µg/ml	2714172	+++	++	++	conserved	orthogonal	our Lab	https://doi.org/10.1101/369983
Gt	TCF7	poly	Merck	yes	1 µg/ml	1078467	+++	neg	++	FA blocked
g1	TCRd	H-41	SCBT	yes	1/100	1130061	neg	neg	neg	neg	historic
Gt	TIM3	poly	Merck	yes	1 µg/ml	1078467	+++	+	++	conserved	orthogonal	our Lab	https://doi.org/10.1101/369983
Rat	TOX1	NAN448A	Abcam/Epitomics	yes	1 µg/ml		neg	++	+++	FA dependent	genetic	Company
g2B	TP53	DO-7	Dako	yes	1 µg/ml		neg	neg	+++	conformational	independent Ab	our Lab	PMID: 3276632
RbMab	VISTA	D1L2G + D5L5T	CST	yes	1 µg/ml		++	neg	+/-	FA blocked	orthogonal	Company
Gt	vWF	poly	Merck	yes	1 µg/ml	1078467	+++	+++	+++	conserved	cross-species, historic	our Lab	10.1369/0022155415597738
Rb	ZEB1	poly	Merck	yes	1 µg/ml	1078467	+++	note	note	misc	cross-species	our Lab	10.1369/0022155415597738
g2A	ZEB1	3G6	LsBio	yes	1 µg/ml	2572969	note	+++	++	FA dependent	cross-species	our Lab	10.1369/0022155415597738

## Sheet: Secondary antibodies
Target	Secondary antibody	Host	Subtype	Reference	Supplier
Rb	Alexa Fluor® 488 Donkey Anti-Rabbit IgG (H+L) (min X Bov, Ck, Gt, GP, Sy Hms, Hrs, Hu, Ms, Rat, Shp Sr Prot)	Dk	polyclonal	711-545-152	Jackson Immunoresearch
Rb	Alexa Fluor® 488 AffiniPure Goat Anti-Rabbit IgG (H+L) (min X Hu, Ms, Rat Sr Prot)	Gt	polyclonal	111-545-144	Jackson Immunoresearch
Mo	Alexa Fluor® 488 AffiniPure Dk Anti-Mouse IgG (min X Bov, Ck, Gt, GP, Sy Hms, Hrs, Hu, Ms, Rat, Shp Sr Prot)	Dk	polyclonal	715-545-151	Jackson Immunoresearch
Mo	Alexa Fluor® 488 AffiniPure Goat Anti-Mouse IgG (H+L) (min X Hu, Bov, Hrs, Rb, Rat Sr Prot)	Gt	polyclonal	115-545-166	Jackson Immunoresearch
IgG1	Alexa Fluor® 488 AffiniPure Goat Anti-Mouse IgG, Fc Subclass 1 Specific	Gt	polyclonal	115-545-205	Jackson Immunoresearch
IgG2a	Alexa Fluor® 488 AffiniPure Goat Anti-Mouse IgG, Fc Subclass 2a Specific	Gt	polyclonal	115-545-206	Jackson Immunoresearch
IgG2b	Alexa Fluor® 488 AffiniPure Goat Anti-Mouse IgG, Fc Subclass 2b Specific	Gt	polyclonal	115-545-207	Jackson Immunoresearch
Gt	Alexa Fluor® 488-AffiniPure Donkey Anti-Goat IgG (H+L) (min X Bov, Ck, Gt, GP, Sy Hms, Hrs, Hu, Rb, Rat, Shp Sr Prot)	Dk	polyclonal	705-545-147	Jackson Immunoresearch
Rb	Brilliant Violet 480 AffiniPure Donkey Anti-Rabbit IgG (H+L) (min X Bov, Ck, Gt, GP, Sy Hms, Hrs, Hu, Ms, Rat, Shp Sr Prot)	Dk	polyclonal	711-685-152	Jackson Immunoresearch
Mo	Brilliant Violet 480 AffiniPure Donkey Anti-Mouse IgG (H+L) (min X Bov, Ck, Gt, GP, Sy Hms, Hrs, Hu, Rb, Rat, Shp Sr Prot)	Dk	polyclonal	715-685-151	Jackson Immunoresearch
IgG1	Brilliant Violet 480™ AffiniPure Goat Anti-Mouse IgG, Fcγ Subclass 1 Specific (min X Hu, Bov, Rb Sr Prot)	Gt	polyclonal	115-685-205	Jackson Immunoresearch
IgG2a	Brilliant Violet 480™ AffiniPure Goat Anti-Mouse IgG, Fcγ Subclass 2a Specific (min X Hu, Bov, Rb Sr Prot)	Gt	polyclonal	115-685-206	Jackson Immunoresearch
IgG2b	Brilliant Violet 480™ AffiniPure Goat Anti-Mouse IgG, Fcγ Subclass 2b Specific (min X Hu, Bov, Rb Sr Prot)	Gt	polyclonal	115-685-207	Jackson Immunoresearch
Gt	Brilliant Violet 480™ Donkey anti Goat IgG (H+L) (min X Ck, GP, Sy Hms, Hrs, Hu, Ms, Rb, Rat Sr Prot)	Dk	polyclonal	705-685-147	Jackson Immunoresearch
Rb	Rhodamine Red™-X (RRX) AffiniPure Goat Anti-Rabbit IgG (H+L)(min X Hu, Ms, Rat Sr Prot)	Gt	polyclonal	111-295-144	Jackson Immunoresearch
Mo	Rhodamine Red™-X (RRX) AffiniPure Donkey Anti-Mouse IgG(H+L)(min X Hu, Ms, Rat Sr Prot)	Dk	polyclonal	715-295-151	Jackson Immunoresearch
Mo	Rhodamine Red™-X (RRX) AffiniPure Goat Anti-Mouse IgG (H+L) (min X Hu, Bov, Hrs, Rb, Rat Sr Prot)	Gt	polyclonal	115-295-166	Jackson Immunoresearch
IgG1	Rhodamine Red™-X (RRX) AffiniPure Goat Anti-Mouse IgG, Fcγ Subclass ` Specific (min X Hu, Bov, Rb Sr Prot)	Gt	polyclonal	115-295-205	Jackson Immunoresearch
IgG2a	Rhodamine Red™-X (RRX) AffiniPure Goat Anti-Mouse IgG, Fcγ Subclass 2a Specific (min X Hu, Bov, Rb Sr Prot)	Gt	polyclonal	115-295-206	Jackson Immunoresearch
IgG2b	Rhodamine Red™-X (RRX) AffiniPure Goat Anti-Mouse IgG, Fcγ Subclass 2b Specific (min X Hu, Bov, Rb Sr Prot)	Gt	polyclonal	115-295-207	Jackson Immunoresearch
IgG3	Rhodamine Red™-X (RRX) AffiniPure Goat Anti-Mouse IgG, Fcγ Subclass 3 Specific (min X Hu, Bov, Rb Sr Prot)	Gt	polyclonal	115-295-209	Jackson Immunoresearch
Rat	Rhodamine Red™-X (RRX) AffiniPure Donkey Anti-Rat IgG (H+L) (min X Hu, Bov, Hrs, Ms, Rb Sr Prot)	Dk	polyclonal	712-295-153	Jackson Immunoresearch
Gt	Rhodamine Red™-X (RRX) Donkey anti Goat IgG (H+L) (min X Ck, GP, Sy Hms, Hrs, Hu, Ms, Rb, Rat Sr Prot)	Dk	polyclonal	705-295-147	Jackson Immunoresearch
Gt	Alexa Fluor® 647-AffiniPure Donkey Anti-Goat IgG (H+L) (min X Bov, Ck, Gt, GP, Sy Hms, Hrs, Hu, Rb, Rat, Shp Sr Prot)	Dk	polyclonal	705-605-147	Jackson Immunoresearch
Rb	Alexa Fluor® 647 AffiniPure Donkey Anti-Rabbit IgG (min X Bov, Ck, Gt, GP, Sy Hms, Hrs, Hu, Ms, Rat, Shp Sr Prot)	Dk	polyclonal	711-605-152	Jackson Immunoresearch
Mo	AffiniPure Donkey Anti-Mouse IgG (H+L) Alexa647 (min X Bov, Ck, Gt, GP, Sy Hms, Hrs, Hu, Rb, Rat, Shp Sr Prot)	Dk	polyclonal	715-605-151	Jackson Immunoresearch
IgG1	Alexa Fluor® 647 AffiniPure Goat Anti-Mouse IgG, Fcγ Subclass 1 Specific (min X Hu, Bov, Rb Sr Prot)	Gt	polyclonal	115-605-205	Jackson Immunoresearch
IgG2a	Alexa Fluor® 647 AffiniPure Goat Anti-Mouse IgG, Fcγ Subclass 2a Specific (min X Hu, Bov, Rb Sr Prot)	Gt	polyclonal	115-605-206	Jackson Immunoresearch
IgG2b	Alexa Fluor® 647 AffiniPure Goat Anti-Mouse IgG, Fcγ Subclass 2b Specific (min X Hu, Bov, Rb Sr Prot)	Gt	polyclonal	115-605-207	Jackson Immunoresearch
IgG3	Alexa Fluor® 647 AffiniPure Goat Anti-Mouse IgG, Fcγ Subclass 3 Specific (min X Hu, Bov, Rb Sr Prot)	Gt	polyclonal	115-605-209	Jackson Immunoresearch
Rat	Alexa Fluor® 647 AffiniPure Donkey Anti-Rat IgG (H+L) (min X Bov, Ck, Gt, GP, Sy Hms, Hrs, Hu, Ms, Rb, Shp Sr Prot)	Dk	polyclonal	712-605-153	Jackson Immunoresearch
Rb	ImmPRESS® HRP Horse Anti-Rabbit IgG PLUS Polymer Kit, Peroxidase	Hr	polyclonal	MP-7451-15	Vector Labs
Mo	ImmPRESS® HRP Horse Anti-Mouse IgG PLUS Polymer Kit, Peroxidase	Hr	polyclonal	MP-7802-15	Vector Labs
Rat	ImmPRESS® HRP Horse Anti-Rat IgG PLUS Polymer Kit, Peroxidase	Gt	polyclonal	MP-7444-15	Vector Labs
Gt	ImmPRESS® HRP Horse Anti-Goat IgG PLUS Polymer Kit, Peroxidase	Hr	polyclonal	MP-7452-15	Vector Labs
